# Supplementary material
Source: PubMed Central journal article supplement (PMC5665093)
Supplement: Supp_Table1.pdf [file Supp_Table1.pdf]

## Supplementary Data

SUPPLEMENTARY TABLE S1. REASONS FOR LACK OF PRE-EXPOSURE PROPHYLAXIS (PrEP)  
ELIGIBILITY AS PER CDC GUIDELINES AMONG PrEP NONUSERS (N=803)

| <i>CAI</i>                     | <i>Condomless sex with a woman</i> | <i>IDU</i>                           | N   | %    |
|--------------------------------|------------------------------------|--------------------------------------|-----|------|
| Over 6 months ago              | Never                              | Never                                | 441 | 54.9 |
| Never                          | Never                              | Never                                | 269 | 33.5 |
| Over 6 months ago              | Over 6 months ago                  | Never                                | 51  | 6.4  |
| Never                          | Over 6 months ago                  | Never                                | 24  | 3.9  |
| Over 6 months ago              | Never                              | IDU history, but no shared equipment | 8   | 1.0  |
| Refused to answer/did not know | Never                              | Never                                | 3   | 0.37 |
| Never                          | Never                              | Refused to answer/did not know       | 2   | 0.25 |
| Never                          | Never                              | IDU history, but no shared equipment | 2   | 0.25 |
| Over 6 months ago              | Refused to answer/did not know     | Refused to answer/did not know       | 2   | 0.25 |
| Over 6 months ago              | Never                              | Refused to answer/did not know       | 1   | 0.12 |

CAI, condomless anal intercourse; CDC, Centers for Disease Control and Prevention; IDU, injection drug use.
