# Supplementary material
Source: PubMed Central journal article supplement (PMC5665093)
Supplement: Supp_Table2.pdf [file Supp_Table2.pdf]

SUPPLEMENTARY TABLE S2. PARTICIPANT CHARACTERISTICS AMONG PRE-EXPOSURE PROPHYLAXIS (PrEP)-ELIGIBLE VERSUS -NONELIGIBLE NONUSERS AND PrEP- ELIGIBLE NONUSERS VERSUS PrEP USERS

|                                        | <i>Eligible nonusers</i> | <i>Versus noneligible</i> | p       | <i>Versus PrEP- eligible users (n=69)<sup>a</sup></i> | p       |
|----------------------------------------|--------------------------|---------------------------|---------|-------------------------------------------------------|---------|
|                                        | (n = 1464)               | (n = 803)                 |         | (n = 69) <sup>a</sup>                                 |         |
|                                        | n (%) / median (IQR)     | n (%) / median (IQR)      |         | n (%) / median (IQR)                                  |         |
| <b>Demographics/social background</b>  |                          |                           |         |                                                       |         |
| <b>Race</b>                            |                          |                           |         |                                                       |         |
| Black                                  | 271 (19)                 | 169 (21)                  | 0.05    | 11 (16)                                               | 0.55    |
| Hispanic                               | 563 (38)                 | 267 (33)                  |         | 24 (35)                                               |         |
| White                                  | 630 (43)                 | 367 (46)                  |         | 34 (49)                                               |         |
| Age                                    | 22 (20–23)               | 22 (20–23)                | 0.59    | 23 (22–24)                                            | <0.01   |
| <b>Education</b>                       |                          |                           |         |                                                       |         |
| Less than high school                  | 76 (5)                   | 52 (6)                    | 0.51    | 1 (1)                                                 | 0.06    |
| High school/GED                        | 192 (13)                 | 112 (14)                  |         | 7 (10)                                                |         |
| Less than bachelor degree              | 906 (62)                 | 477 (59)                  |         | 39 (57)                                               |         |
| Bachelor degree or higher              | 287 (20)                 | 160 (20)                  |         | 22 (32)                                               |         |
| Refused/did not know                   | 3 (0.2)                  | 2 (0.3)                   |         | 0                                                     |         |
| <b>Community type</b>                  |                          |                           |         |                                                       |         |
| Large city or suburb                   | 574 (39)                 | 326 (41)                  | 0.40    | 39 (57)                                               | 0.07    |
| Medium city or suburb                  | 493 (34)                 | 245 (31)                  |         | 17 (25)                                               |         |
| Small city                             | 183 (13)                 | 119 (15)                  |         | 6 (9)                                                 |         |
| Town                                   | 151 (10)                 | 82 (10)                   |         | 4 (6)                                                 |         |
| Rural area                             | 55 (4)                   | 28 (3)                    |         | 3 (4)                                                 |         |
| Refused/did not know                   | 8 (0.6)                  | 3 (0.4)                   |         | 0                                                     |         |
| <b>US Region</b>                       |                          |                           |         |                                                       |         |
| Midwest                                | 337 (23)                 | 173 (22)                  | 0.83    | 13 (19)                                               | 0.78    |
| South                                  | 617 (42)                 | 337 (42)                  |         | 33 (48)                                               |         |
| West                                   | 274 (19)                 | 157 (20)                  |         | 12 (17)                                               |         |
| Northeast                              | 236 (16)                 | 136 (17)                  |         | 11 (16)                                               |         |
| <b>Live alone</b>                      |                          |                           |         |                                                       |         |
| Yes                                    | 357 (24)                 | 206 (26)                  | 0.48    | 27 (39)                                               | <0.01   |
| No                                     | 1104 (75)                | 593 (74)                  |         | 42 (61)                                               |         |
| Refused/did not know                   | 3 (0.2)                  | 4 (0.5)                   |         | 0                                                     |         |
| <b>Healthcare access</b>               |                          |                           |         |                                                       |         |
| <b>Have a PCP/clinic for care</b>      |                          |                           |         |                                                       |         |
| Yes                                    | 990 (68)                 | 573 (71)                  | 0.04    | 64 (93)                                               | <0.0001 |
| No                                     | 446 (30)                 | 211 (26)                  |         | 5 (7)                                                 |         |
| Refused/did not know                   | 28 (2)                   | 19 (2)                    |         | 0                                                     |         |
| <b>Health Insurance</b>                |                          |                           |         |                                                       |         |
| Yes                                    | 1091 (75)                | 606 (75)                  | 0.64    | 60 (87)                                               | 0.03    |
| No                                     | 347 (24)                 | 183 (23)                  |         | 9 (13)                                                |         |
| Refused/did not know                   | 26 (2)                   | 14 (2)                    |         | 0                                                     |         |
| <b>Sexual behavior/perceived risk</b>  |                          |                           |         |                                                       |         |
| <b>Last CAI with a man</b>             |                          |                           |         |                                                       |         |
| Never                                  | 11 (0.87)                | 300 (37)                  | <0.0001 | 0                                                     | 0.08    |
| Less than a month ago                  | 836 (57)                 | 0                         |         | 50 (72)                                               |         |
| Between 1 and 6 months ago             | 600 (41)                 | 0                         |         | 19 (28)                                               |         |
| More than 6 months ago                 | 16 (1)                   | 500 (62)                  |         | 0                                                     |         |
| Refused/did not know                   | 1 (0.1)                  | 3 (0.4)                   |         | 0                                                     |         |
| <b>Perceived risk of HIV infection</b> |                          |                           |         |                                                       |         |
| Possible                               | 1159 (79)                | 537 (67)                  | <0.0001 | 50 (72)                                               | 0.03    |
| Not possible at all                    | 246 (17)                 | 249 (31)                  |         | 19 (28)                                               |         |
| Refused/did not know                   | 59 (4)                   | 17 (2)                    |         | 0                                                     |         |
| <b>Casual CAI with a man</b>           |                          |                           |         |                                                       |         |
| No CAI with a man                      | 11 (0.8)                 | 297(37)                   | <0.0001 | 0                                                     | 0.73    |
| No casual CAI with a man               | 165 (11)                 | 113 (14)                  |         | 6 (9)                                                 |         |
| Casual CAI with a man                  | 1152 (79)                | 361 (45)                  |         | 50 (72)                                               |         |
| Refused/did not know                   | 149 (10)                 | 32 (4)                    |         | 13 (19)                                               |         |
| <b>Exchange CAI with a man</b>         |                          |                           |         |                                                       |         |

(continued)

SUPPLEMENTARY TABLE S2. (CONTINUED)

|                            | <i>Eligible nonusers</i><br>(n=1464) | <i>Versus noneligible</i><br>(n=803) | p       | <i>Versus PrEP- eligible</i><br><i>users (n=69)<sup>a</sup></i> | p    |
|----------------------------|--------------------------------------|--------------------------------------|---------|-----------------------------------------------------------------|------|
|                            | n (%) / <i>median (IQR)</i>          | n (%) / <i>median (IQR)</i>          |         | n (%) / <i>median (IQR)</i>                                     |      |
| No CAI with a man          | 11 (0.8)                             | 297 (37)                             | <0.0001 | 0                                                               | 0.43 |
| No exchange CAI with a man | 1137 (78)                            | 420 (52)                             |         | 50 (72)                                                         |      |
| Exchange CAI with a man    | 265 (18)                             | 67 (8)                               |         | 16 (23)                                                         |      |
| Refused/did not know       | 51 (3)                               | 19 (2)                               |         | 3 (4)                                                           |      |
| Total main partners        | 2 (1–5)                              | 0 (0–2)                              | <0.0001 | 3 (1–6)                                                         | 0.26 |
| Total casual partners      | 4 (1–10)                             | 0 (0–2)                              | <0.0001 | 7 (0–16)                                                        | 0.16 |
| Total exchange partners    | 0 (0)                                | 0 (0)                                | <0.0001 | 0 (0)                                                           | 0.16 |

<sup>a</sup>Of the 80 ever PrEP users, 69 were eligible as per Centers for Disease Control and Prevention guidelines. CAI, condomless anal intercourse; GED, general equivalency diploma; PCP, primary care provider.
