# Supplementary material
Source: PubMed Central journal article supplement (PMC5665093)
Supplement: Supp_Table3.pdf [file Supp_Table3.pdf]

SUPPLEMENTARY TABLE S3. CHARACTERISTICS OF ELIGIBLE PRE-EXPOSURE  
PROPHYLAXIS NONUSERS BY RACE/ETHNICITY (N=1464)

|                                 | <i>Blacks (n=271)</i>       | <i>Hispanics (n=563)</i>    | <i>Whites (n=630)</i>       |          |
|---------------------------------|-----------------------------|-----------------------------|-----------------------------|----------|
|                                 | <i>n (%) / median (IQR)</i> | <i>n (%) / median (IQR)</i> | <i>n (%) / median (IQR)</i> | <i>p</i> |
| Demographics/social background  |                             |                             |                             |          |
| Age                             | 22 (21–23)                  | 22 (20–23)                  | 22 (20–23)                  | 0.28     |
| Education                       |                             |                             |                             |          |
| Less than high school           | 16 (6)                      | 35 (6)                      | 25 (4)                      | 0.23     |
| High school/GED                 | 36 (13)                     | 70 (12)                     | 86 (14)                     |          |
| Less than bachelor degree       | 163 (60)                    | 362 (64)                    | 381 (60)                    |          |
| Bachelor degree or higher       | 55 (20)                     | 95 (17)                     | 137 (22)                    |          |
| Refused/did not know            | 1 (0.6)                     | 1 (0.2)                     | 1 (0.2)                     |          |
| Community type                  |                             |                             |                             |          |
| Large city or suburb            | 120 (45)                    | 241 (43)                    | 39 (57)                     | <0.01    |
| Medium city or suburb           | 88 (32)                     | 190 (34)                    | 17 (25)                     |          |
| Small city                      | 29 (11)                     | 66 (12)                     | 6 (9)                       |          |
| Town                            | 21 (8)                      | 52 (9)                      | 4 (6)                       |          |
| Rural area                      | 9 (3)                       | 12 (2)                      | 3 (4)                       |          |
| Refused/did not know            | 4 (1)                       | 2 (0.4)                     | 0                           |          |
| US region                       |                             |                             |                             |          |
| Midwest                         | 71 (26)                     | 80 (14)                     | 186 (30)                    | <0.0001  |
| South                           | 126 (46)                    | 252 (45)                    | 239 (38)                    |          |
| West                            | 27 (10)                     | 150 (27)                    | 97 (15)                     |          |
| Northeast                       | 47 (17)                     | 81 (14)                     | 108 (17)                    |          |
| Live alone                      |                             |                             |                             |          |
| Yes                             | 65 (24)                     | 147 (26)                    | 145 (23)                    | 0.46     |
| No                              | 206 (76)                    | 415 (74)                    | 483 (77)                    |          |
| Refused/did not know            | 0                           | 1 (0.2)                     | 2 (0.3)                     |          |
| Healthcare access               |                             |                             |                             |          |
| Have a PCP/clinic for care      |                             |                             |                             |          |
| Yes                             | 190 (70)                    | 336 (60)                    | 464 (74)                    | <0.0001  |
| No                              | 76 (28)                     | 214 (38)                    | 156 (25)                    |          |
| Refused/did not know            | 5 (2)                       | 13 (2)                      | 10 (2)                      |          |
| Health insurance                |                             |                             |                             |          |
| Yes                             | 198 (73)                    | 357(63)                     | 536 (85)                    | <0.0001  |
| No                              | 63 (23)                     | 193(34)                     | 91 (14)                     |          |
| Refused/did not know            | 10 (4)                      | 13 (2)                      | 3 (0.5)                     |          |
| Sexual behavior/perceived risk  |                             |                             |                             |          |
| Last CAI                        |                             |                             |                             |          |
| Never                           | 1 (0.4)                     | 5 (0.9)                     | 5 (0.8)                     | 0.48     |
| Less than a month ago           | 143 (53)                    | 318 (56)                    | 375 (60)                    |          |
| Between 1 and 6 months ago      | 124 (46)                    | 232 (16)                    | 244 (39)                    |          |
| More than 6 months ago          | 2 (0.7)                     | 8 (0.6)                     | 6 (1)                       |          |
| Refused/did not know            | 1 (0.4)                     | 0                           | 0                           |          |
| Perceived risk of HIV infection |                             |                             |                             |          |
| Possible                        | 204 (75)                    | 432 (76)                    | 523 (83)                    | <0.01    |
| Not possible at all             | 54 (20)                     | 105 (19)                    | 87 (14)                     |          |
| Refused/did not know            | 13 (5)                      | 26 (5)                      | 20 (3)                      |          |
| Casual CAI with a man           |                             |                             |                             |          |
| No CAI with a man               | 1 (0.4)                     | 5 (0.9)                     | 5 (0.8)                     | 0.73     |
| No casual CAI with a man        | 26 (10)                     | 50 (9)                      | 89 (14)                     |          |
| Casual CAI with a man           | 214 (79)                    | 454 (81)                    | 484 (77)                    |          |
| Refused/did not know            | 30 (11)                     | 54 (10)                     | 52 (8)                      |          |
| Exchange CAI with a man         |                             |                             |                             |          |
| No CAI with a man               | 1 (0.4)                     | 5 (0.9)                     | 5 (0.8)                     | 0.43     |
| No exchange CAI with a man      | 218 (80)                    | 415 (73)                    | 504 (80)                    |          |
| Exchange CAI with a man         | 43 (16)                     | 115 (20)                    | 107 (17)                    |          |
| Refused/did not know            | 9 (3)                       | 28 (5)                      | 14 (2)                      |          |
| Total main partners             | 2 (0–4)                     | 2 (1–4)                     | 2 (1–5)                     | 0.02     |
| Total casual partners           | 3 (1–8)                     | 4 (1–10)                    | 4 (1–11)                    | 0.08     |
| Total exchange partners         | 0 (0)                       | 0 (0)                       | 0 (0)                       | 0.22     |

CAI, condomless anal intercourse; GED, general equivalency diploma; PCP, primary care provider.
